# Supplementary material
Source: ML conference proceedings conference paper supplement (https://openaccess.thecvf.com/content/WACV2022/html/Hartley_SWAG-V_Explanations_for_WACV_2022_paper.html)
Supplement: Supplementary file 1 [file Hartley_SWAG-V_Explanations_for_WACV_2022_supplemental.pdf]

# SWAG-V: Explanations for Video using Superpixels Weighted by Average Gradients

## Supplementary Material

Thomas Hartley  
Cardiff University  
hartleytw@cardiff.ac.uk

Kirill Sidorov  
Cardiff University  
sidorovk@cardiff.ac.uk

Christopher Willis  
BAE Systems Applied Intelligence  
chris.willis@baesystems.com

David Marshall  
Cardiff University  
marshallad@cardiff.ac.uk

In this supplemental material we show examples of explanations created using Kinetics 400 and both R(2+1)D and C3D. For all examples we create explanations using Grad-CAM, Grad-CAM++, Saliency-Tubes, EP-3D, and our 3 SWAG-V variants (SWAG-V<sub>I</sub>, SWAG-V<sub>I+G</sub>, and SWAG-V<sub>G</sub>). As noted in the main paper, we are only able to produce Saliency-Tube results for the R(2+1)D architecture. The following classes are shown:

- Skiing slalom in Figure 1 (R(2+1)D) and Figure 2 (C3D).
- Bobsledding in Figure 3 (R(2+1)D) and Figure 4 (C3D).
- Bungee jumping in Figure 5 (R(2+1)D) and Figure 6 (C3D).
- Skiing crosscountry in Figure 7 (R(2+1)D) and Figure 8 (C3D).

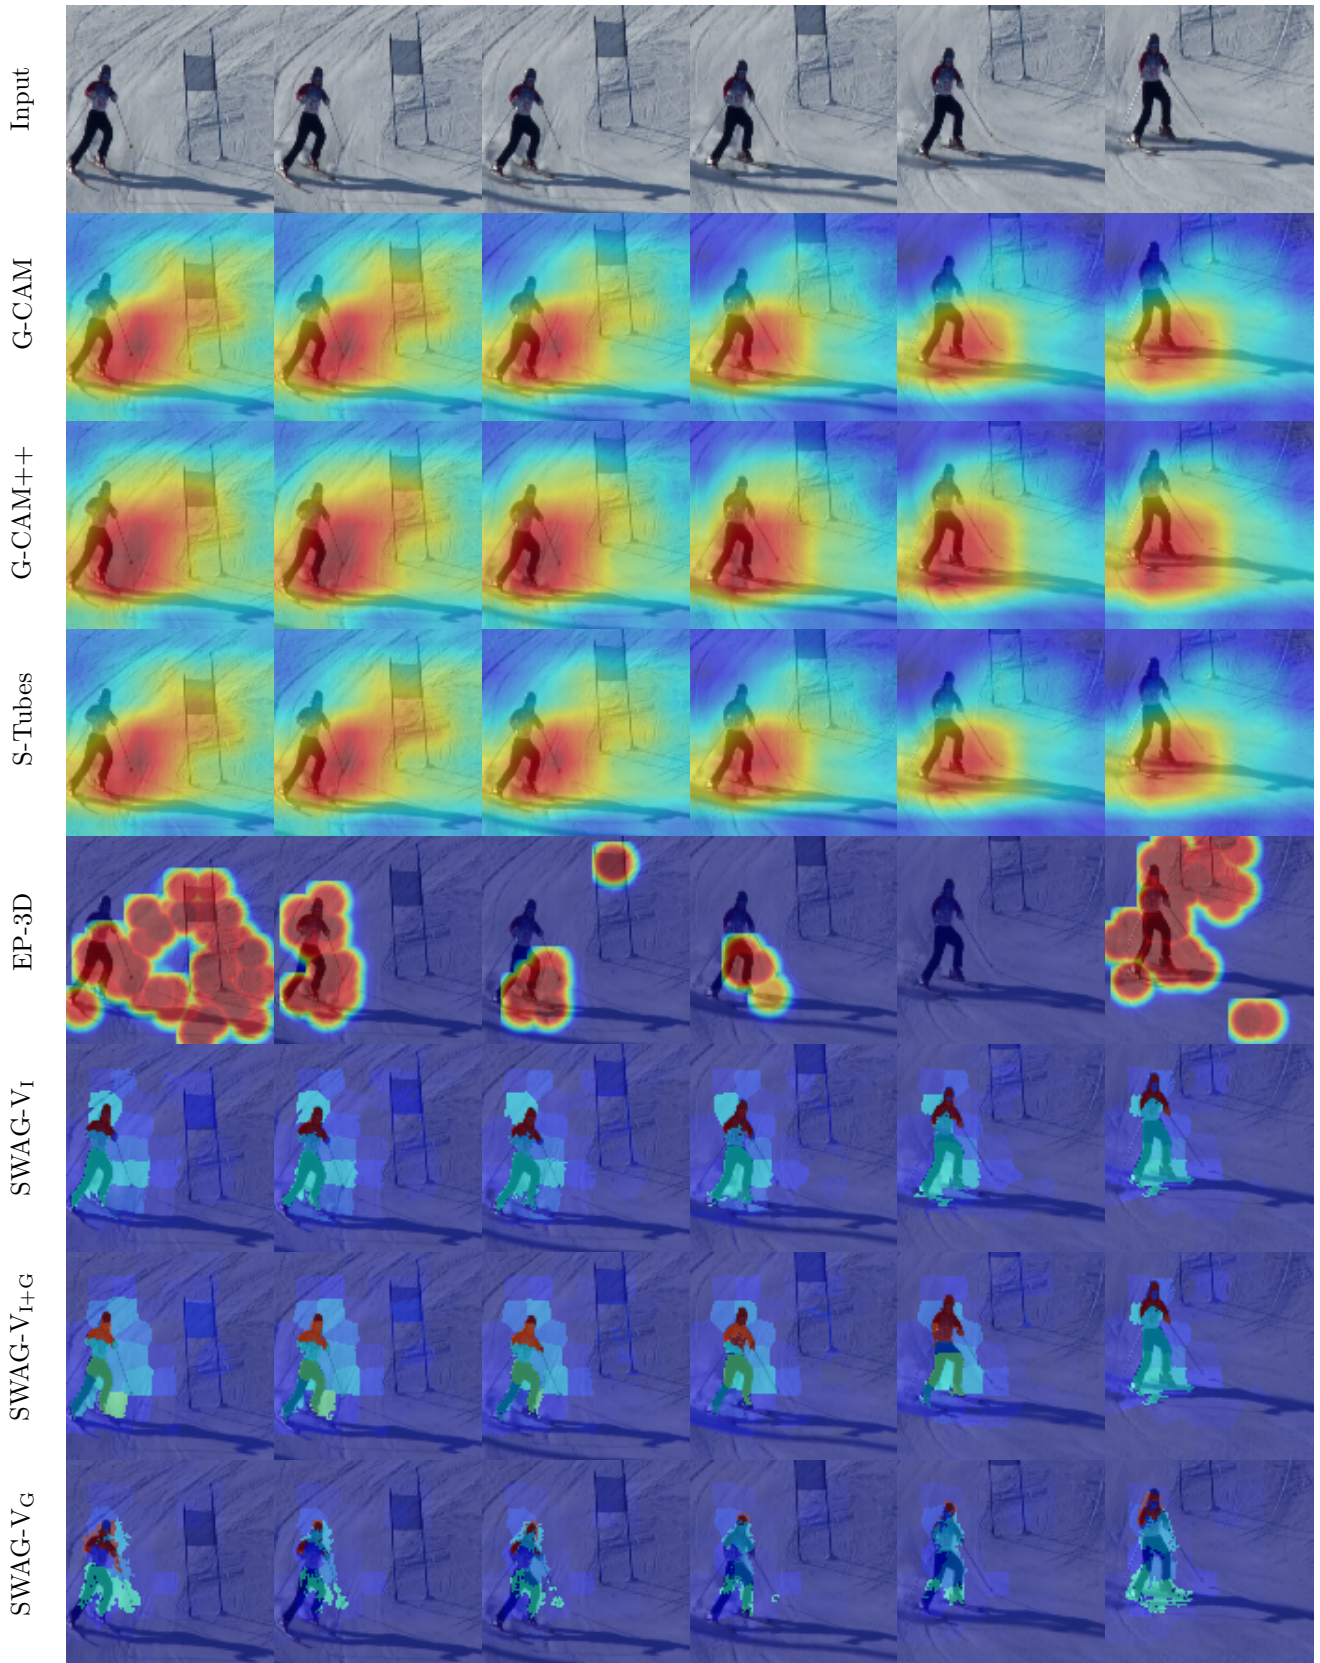

Figure 1: An explanation for the Kinetics 400 class skiing slalom using R(2+1)D.

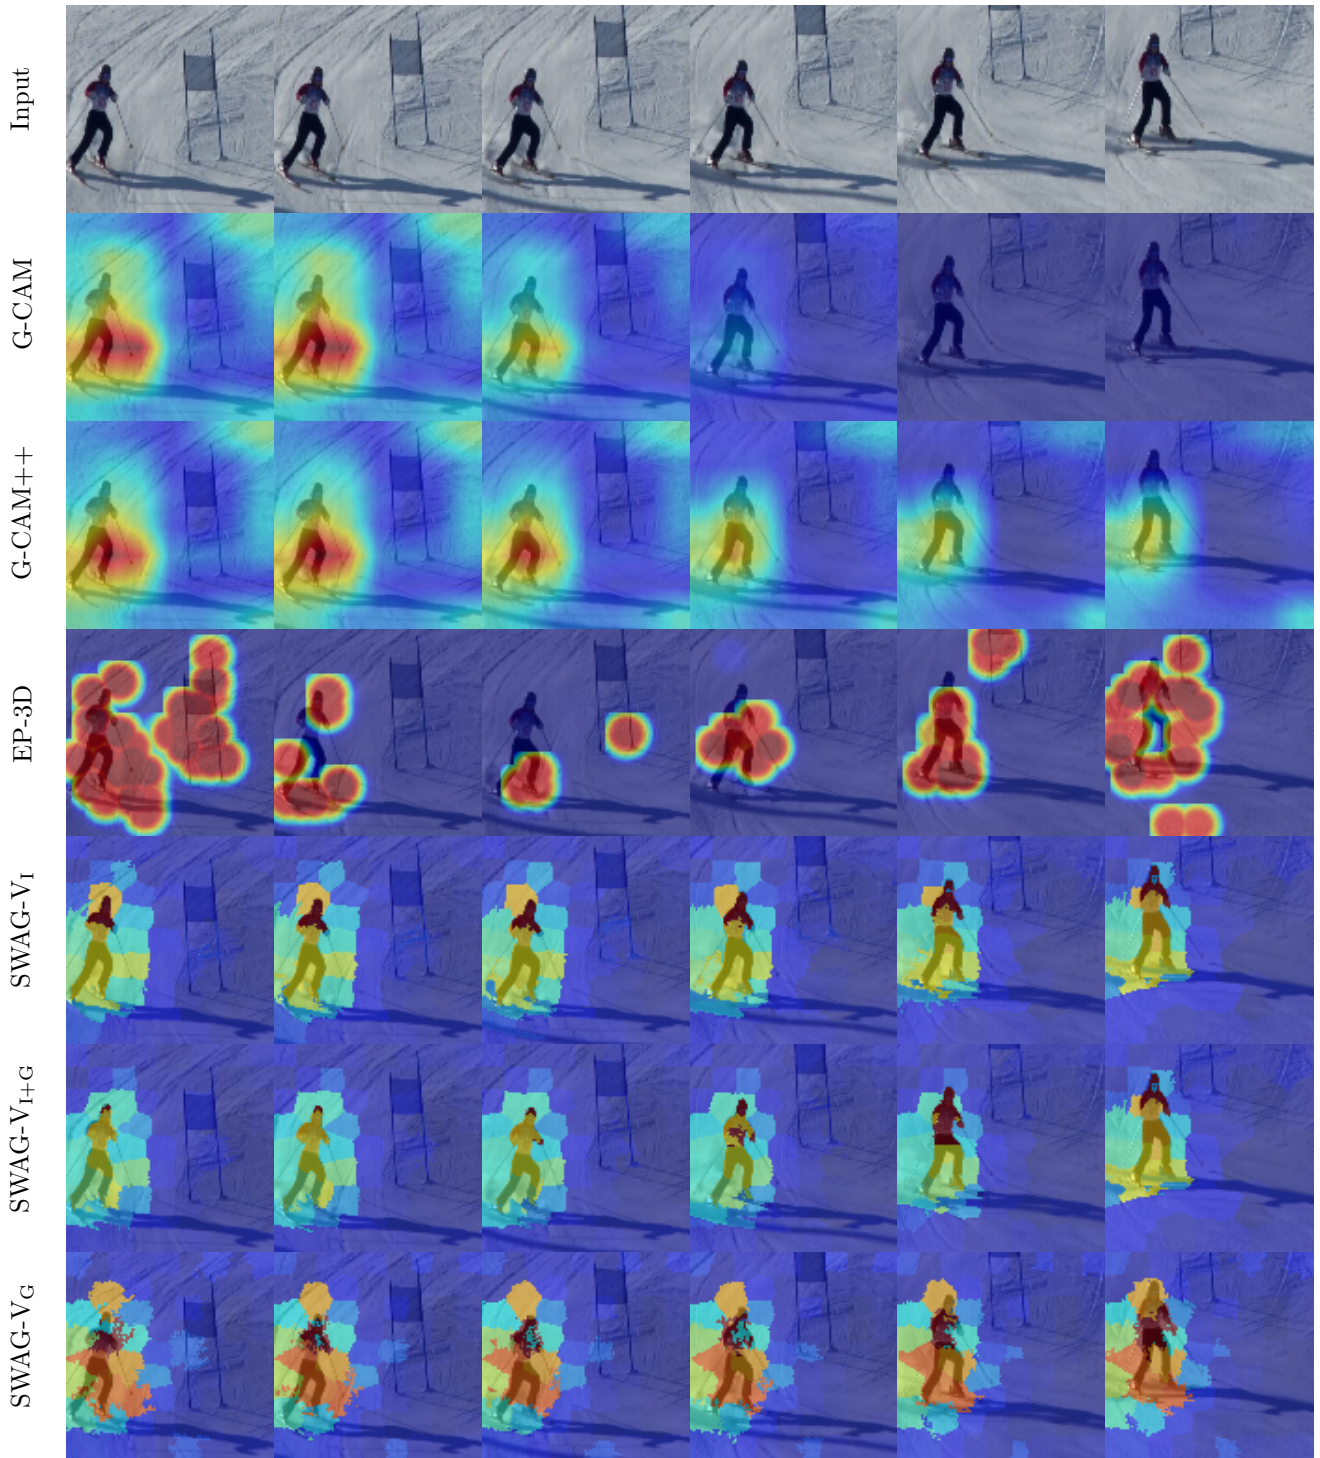

Figure 2: An explanation for the Kinetics 400 class skiing slalom using C3D.

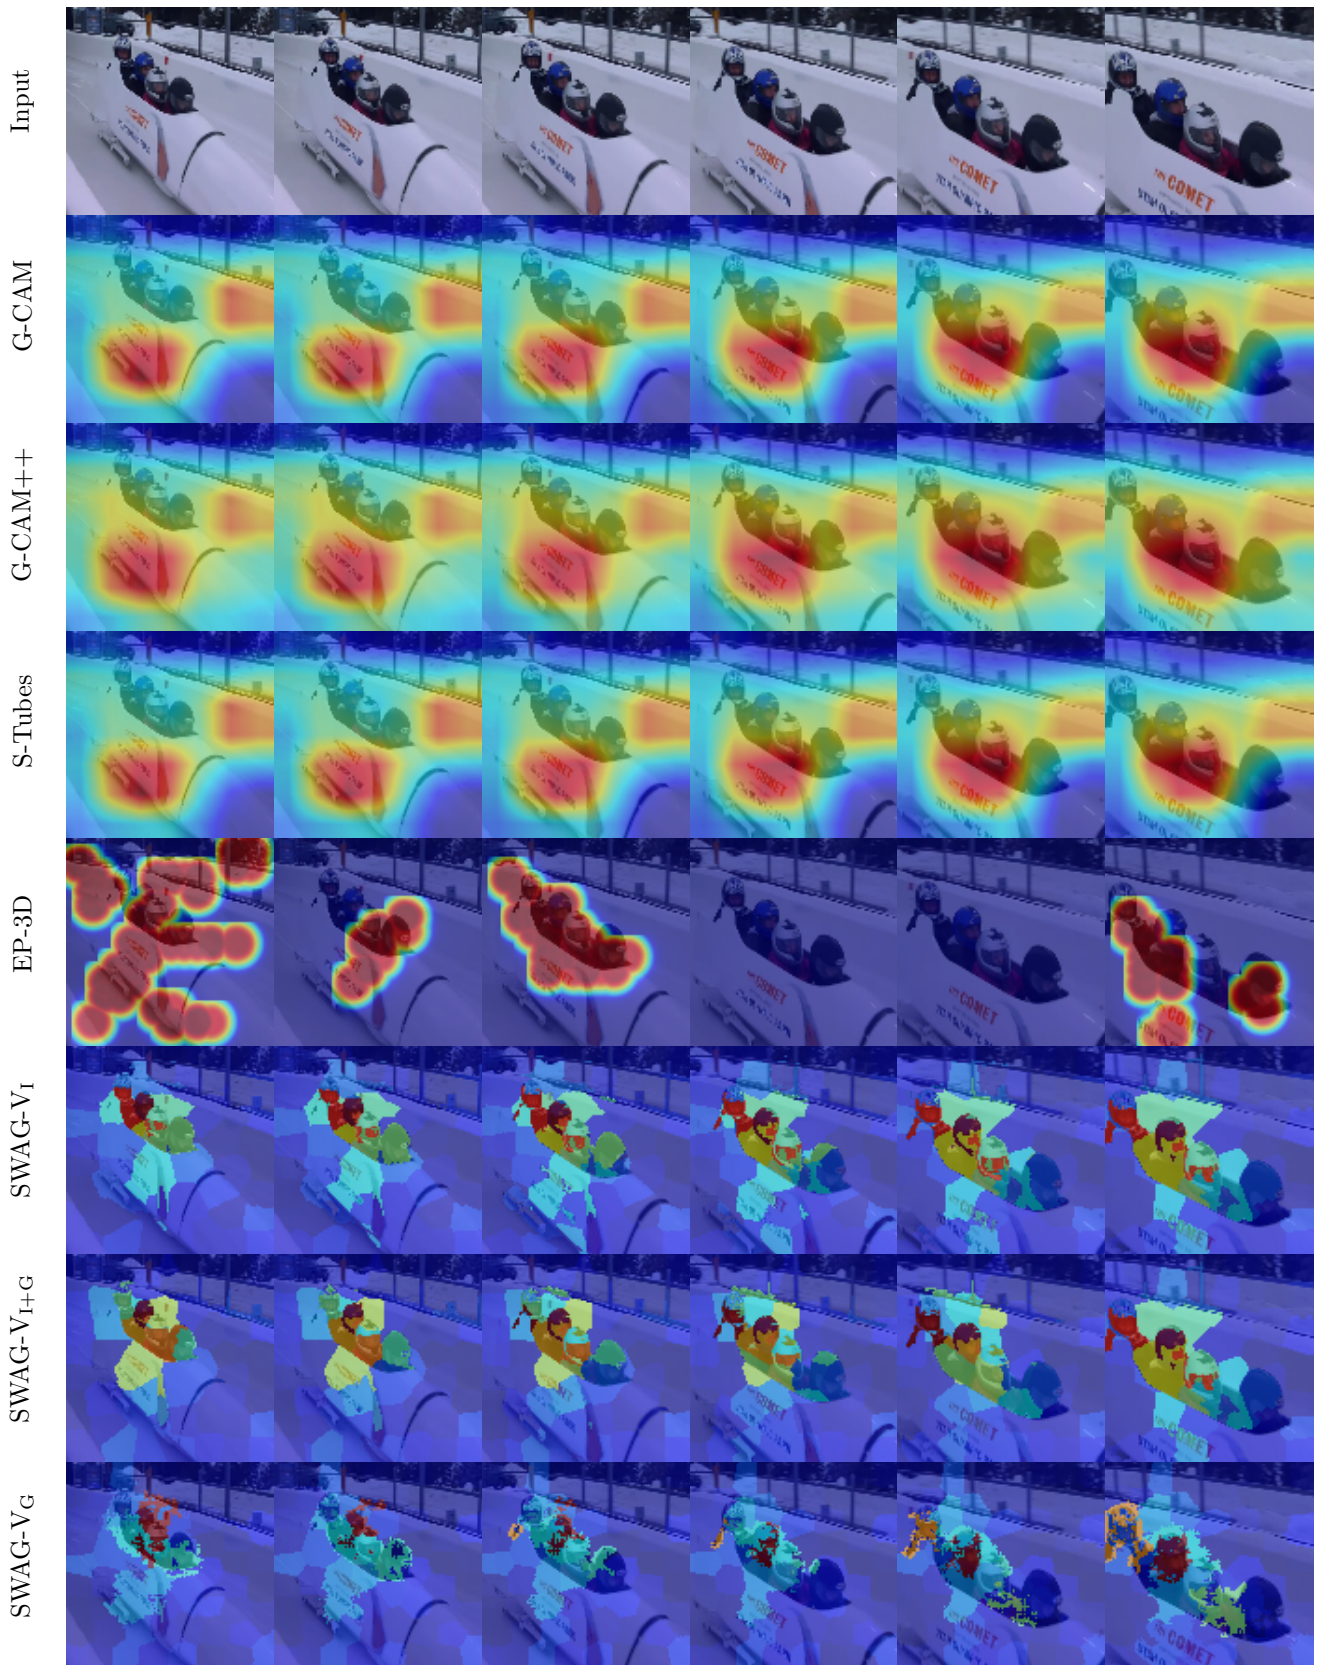

Figure 3: An explanation for the Kinetics 400 class bobsledding using R(2+1)D.

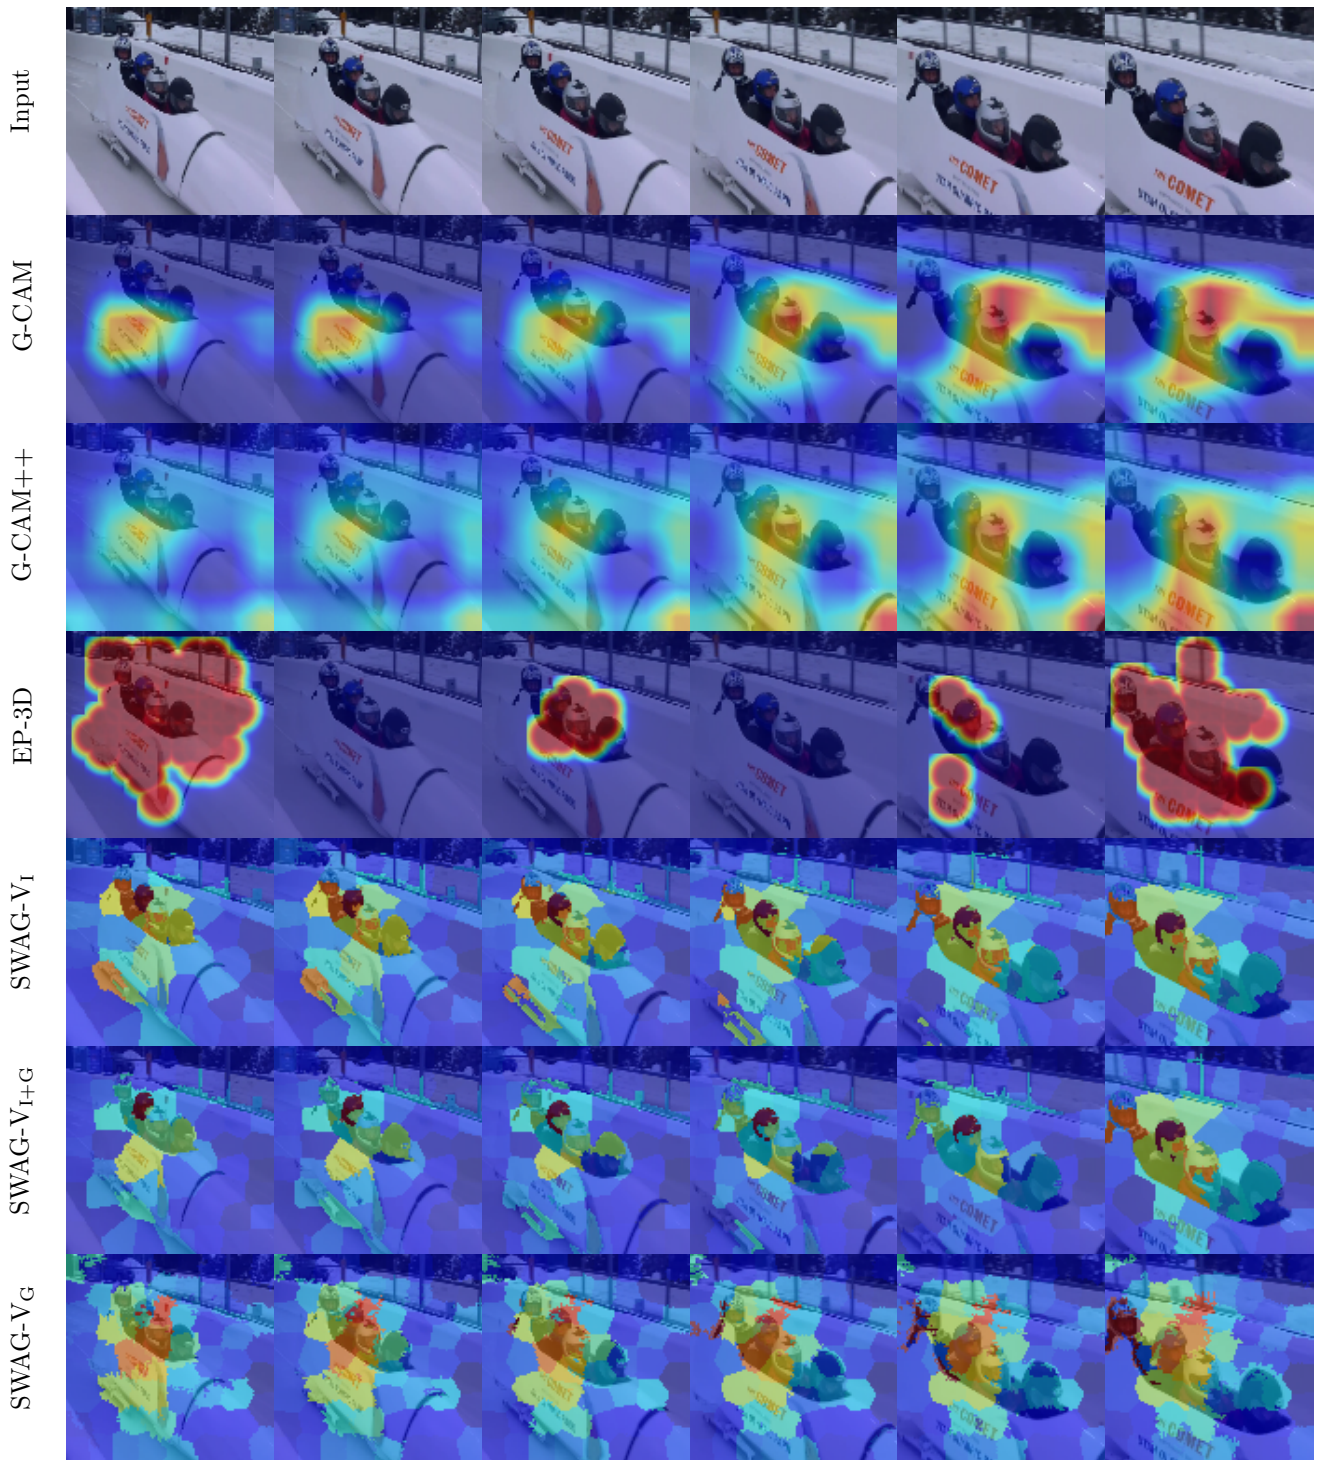

Figure 4: An explanation for the Kinetics 400 class bobsledding using C3D.

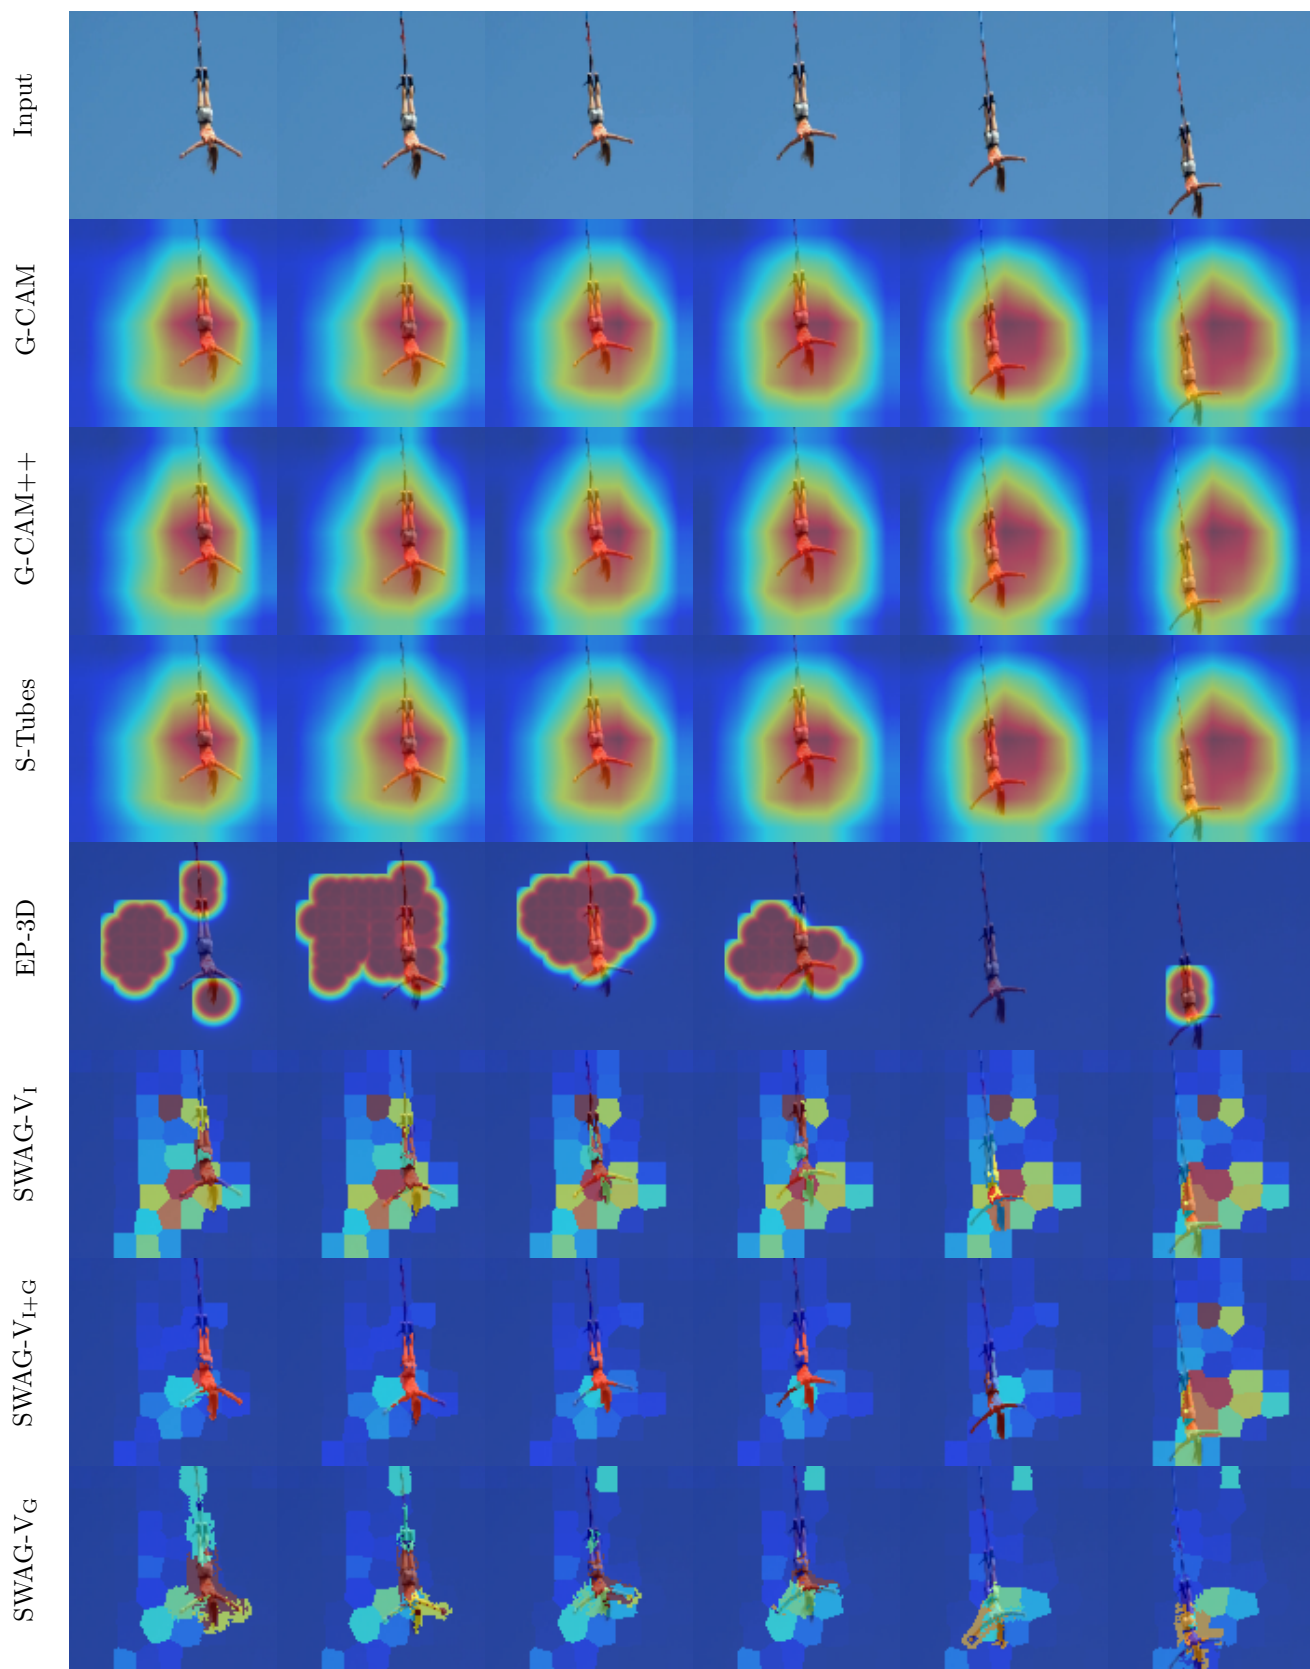

Figure 5: An explanation for the Kinetics 400 class bungee jumping using R(2+1)D.

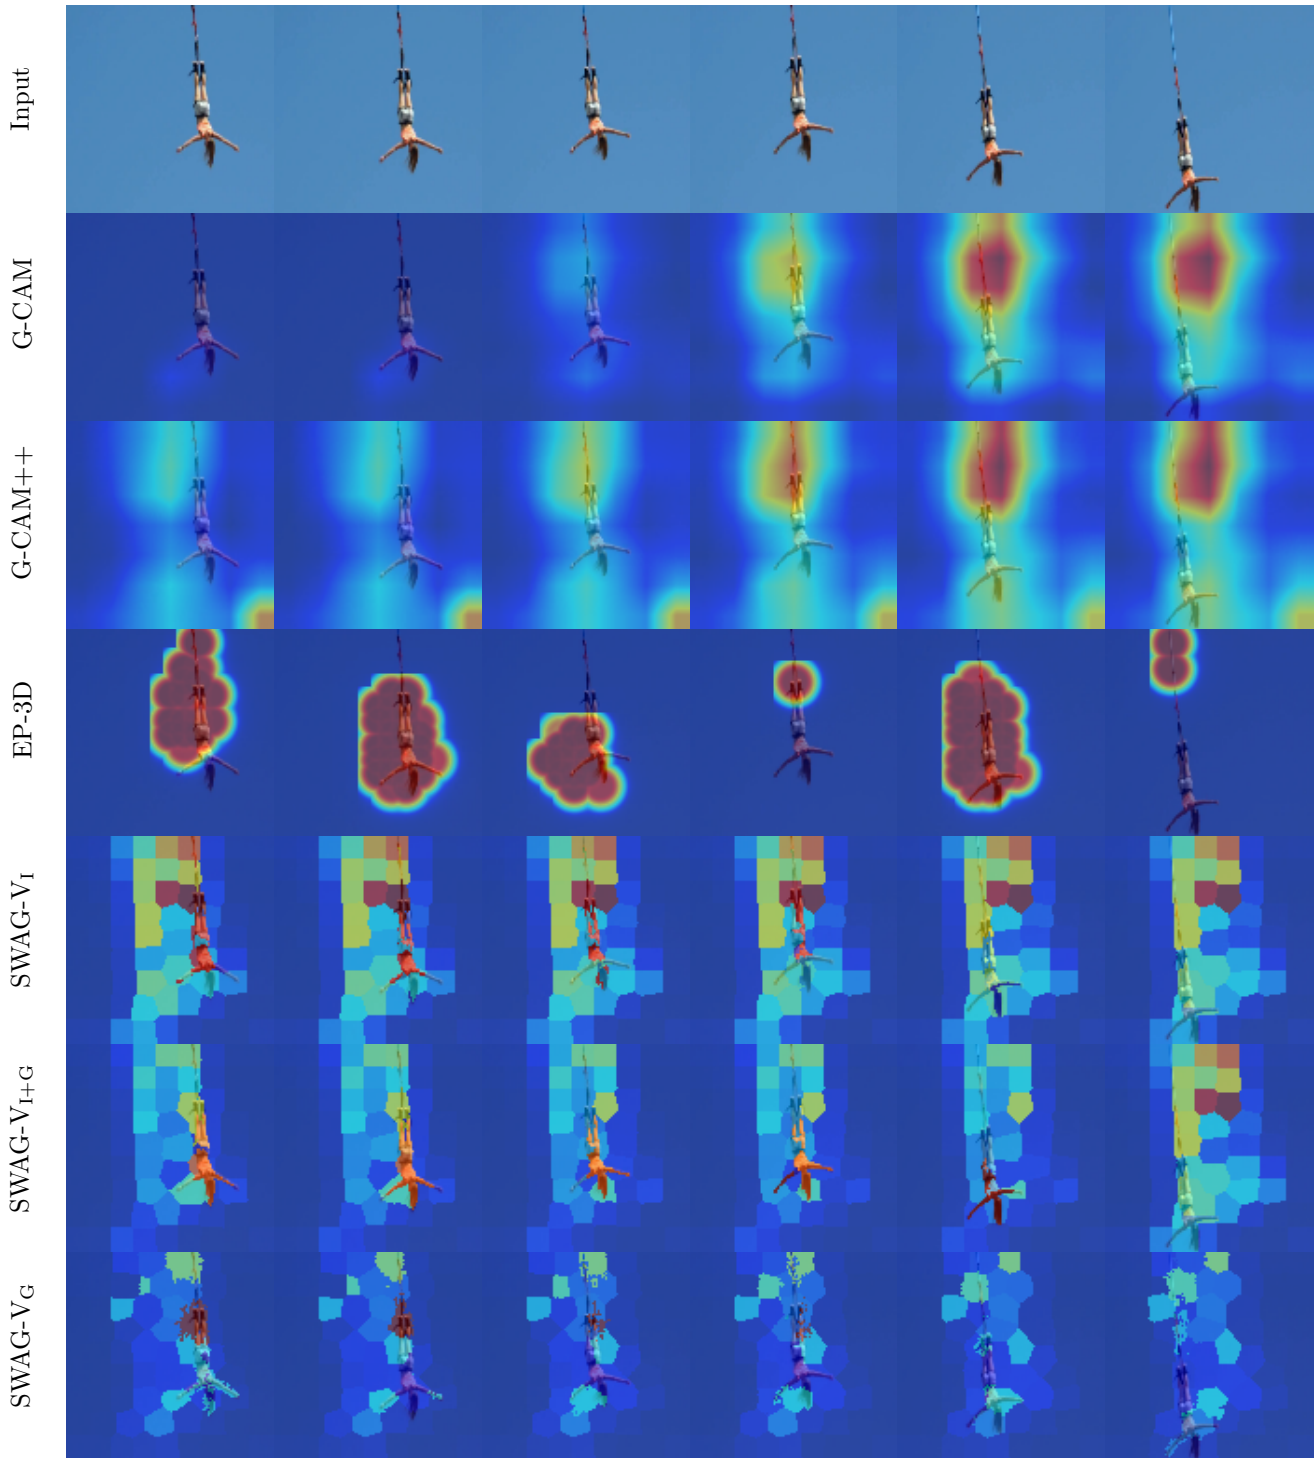

Figure 6: An explanation for the Kinetics 400 class bungee jumping using C3D.

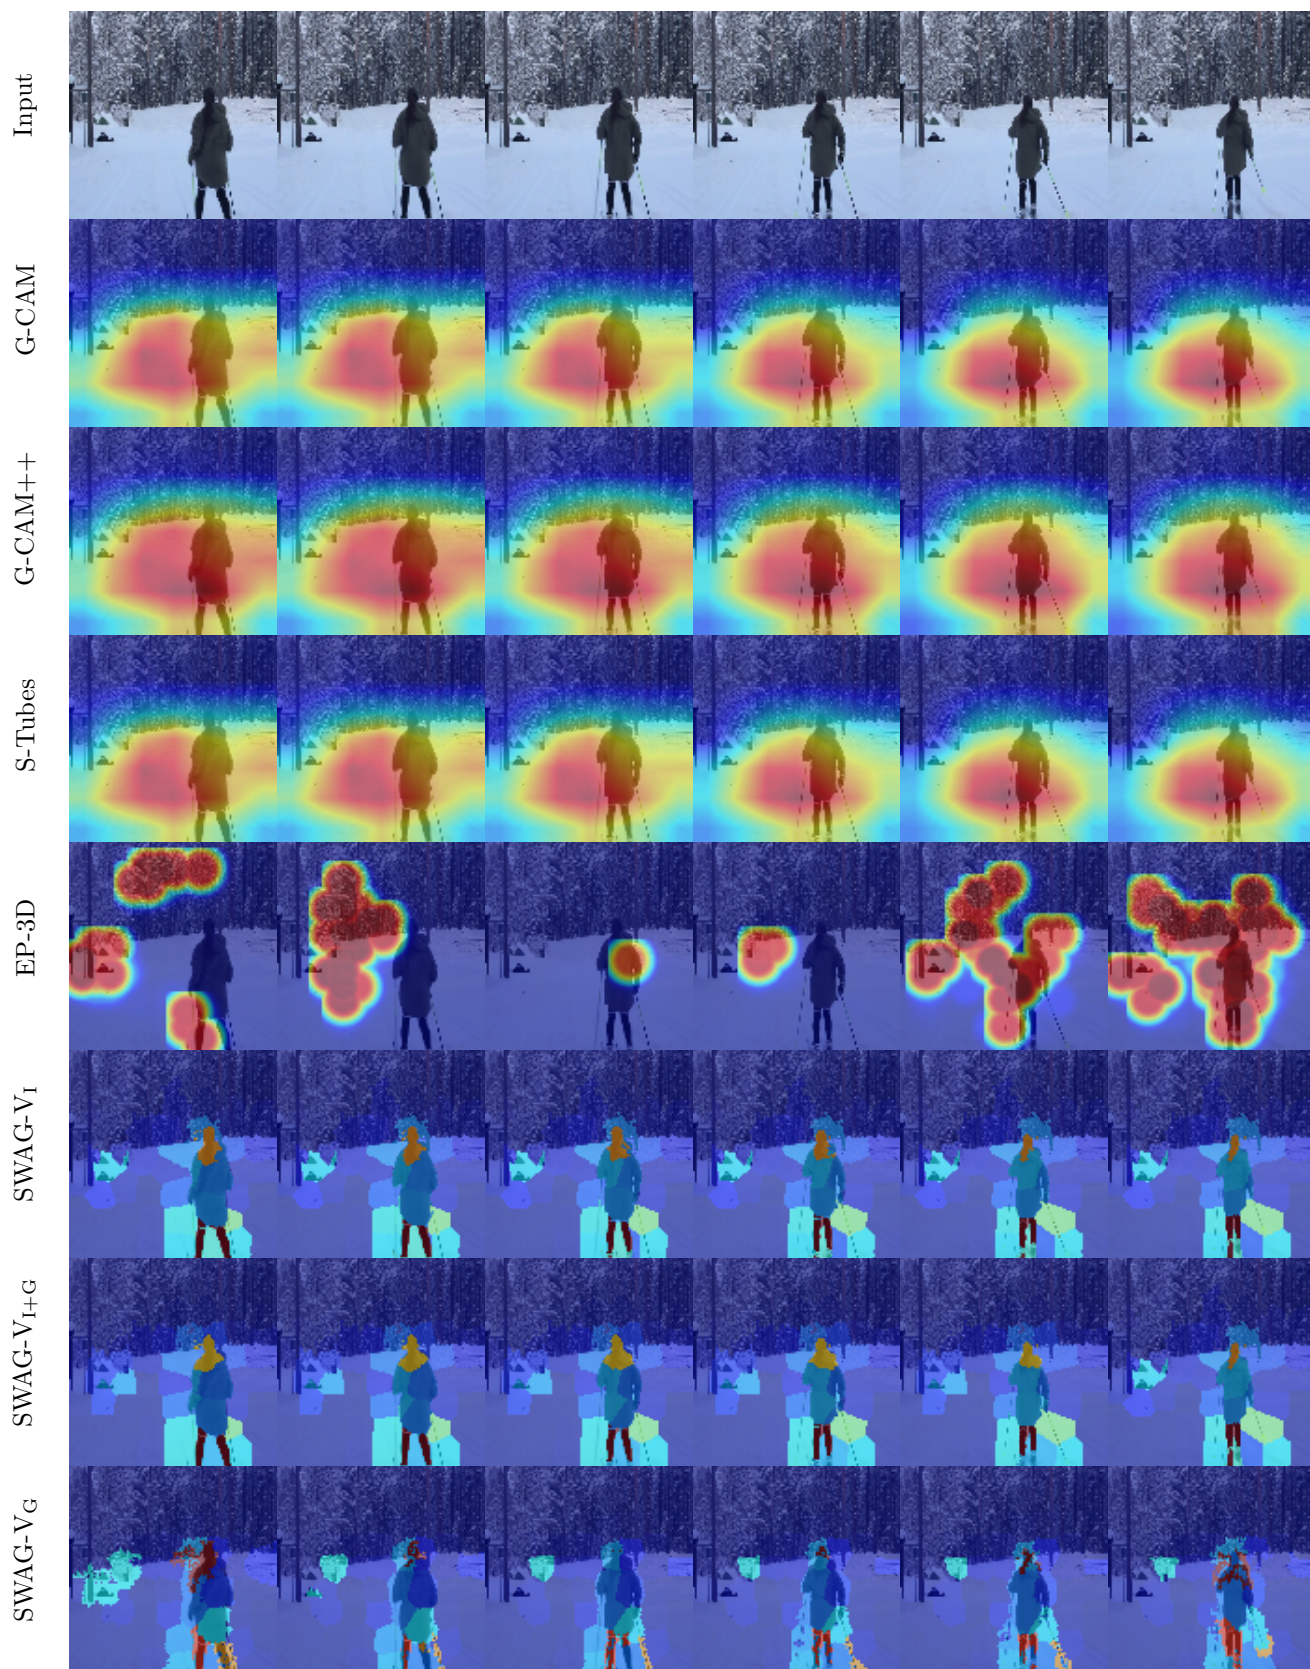

Figure 7: An explanation for the Kinetics 400 class skiing crosscountry using R(2+1)D.



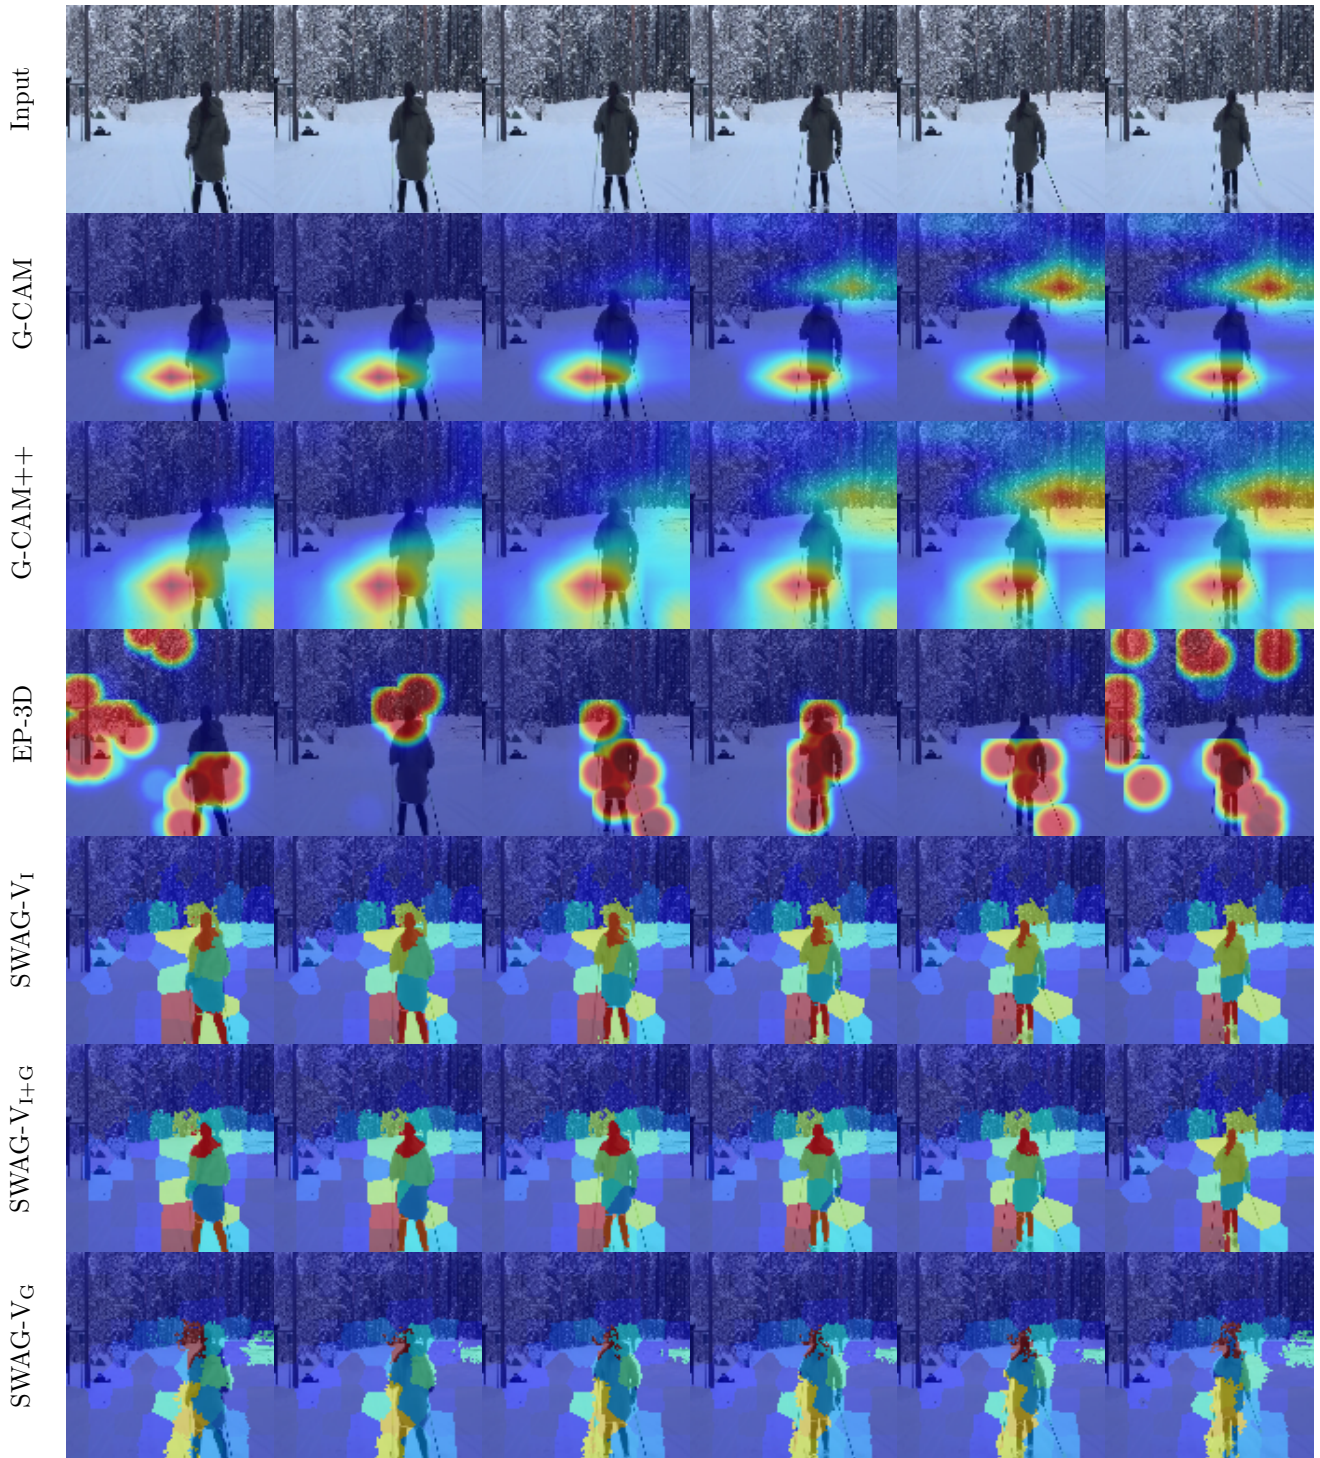

Figure 8: An explanation for the Kinetics 400 class skiing crosscountry using C3D.
